# Supplementary material
Source: Springer Nature journal article supplement (https://www.springermedizin.de/resource/supplementary/12906_2009_293_MOESM2_ESM.pdf/9519360)

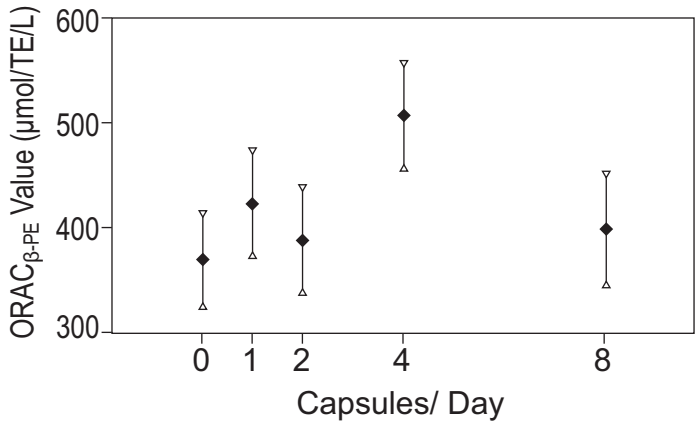

Supplement: MOESM2 [file 9519360]
